# Supplementary material
Source: publisher figshare collection journal article supplement (https://gsapubs.figshare.com/articles/dataset/_/22974638)
Supplement: Supplementary file 1 [file 1]

**Supplemental File S1: Concordant zircon age data ( $\leq \pm 5\%$  degree of discordance) of previous works from MCB and SDFB**

**Footwall Unit (Marwar Crustal Block)**

| References         | age (Ma)      | degree of discordance (%) | Rock type         |
|--------------------|---------------|---------------------------|-------------------|
| Zhao et al., 2018  |               |                           |                   |
| RJ29-3             | 799 $\pm$ 6   | -0.63                     | mirpur granite    |
| RJ29-4             | 844 $\pm$ 8   | -0.12                     | mirpur granite    |
| RJ38-2             | 830 $\pm$ 6   | -0.24                     | mirpur granite    |
| RJ38-11            | 772 $\pm$ 6   | -0.12                     | mirpur granite    |
| RJ81-4             | 824 $\pm$ 8   | -4.97                     | pali granite      |
| RJ81-10            | 967 $\pm$ 8   | 2.03                      | pali granite      |
| RJ81-15            | 833 $\pm$ 6   | -1.96                     | pali granite      |
| RJ29-10            | 794 $\pm$ 6   | 2.34                      | mirpur granite    |
| RJ29-12            | 842 $\pm$ 6   | 4.32                      | mirpur granite    |
| Singh et al., 2021 |               |                           |                   |
| TKB1.30            | 895 $\pm$ 18  | 0.22                      | Sewariya pluton   |
| TKB1.29            | 881 $\pm$ 18  | -0.80                     | Sewariya pluton   |
| TKB1.24            | 882 $\pm$ 18  | 0.68                      | Sewariya pluton   |
| TKB1.27            | 885 $\pm$ 17  | -0.68                     | Sewariya pluton   |
| TKB1.9             | 879 $\pm$ 18  | 0.90                      | Sewariya pluton   |
| TKB1.21            | 857 $\pm$ 20  | 2.61                      | Sewariya pluton   |
| TKB1.22            | 885 $\pm$ 22  | -1.26                     | Sewariya pluton   |
| TKB1.23            | 879 $\pm$ 18  | 3.41                      | Sewariya pluton   |
| TKB1.15            | 849 $\pm$ 17  | 2.75                      | Sewariya pluton   |
| TKB1.16            | 874 $\pm$ 18  | 3.10                      | Sewariya pluton   |
| TKB1.17            | 884 $\pm$ 21  | -4.74                     | Sewariya pluton   |
| TKB1.18            | 884 $\pm$ 18  | 1.67                      | Sewariya pluton   |
| Meert et al., 2013 |               |                           |                   |
| J31                | 1094 $\pm$ 31 | -0.37                     | granite bilara    |
| Mal-12             | 703 $\pm$ 12  | 4.48                      |                   |
| J1                 | 1096 $\pm$ 47 | 2.49                      | granite bilara    |
| J2                 | 1122 $\pm$ 34 | 1.75                      | granite bilara    |
| J5                 | 1068 $\pm$ 35 | 1.29                      | granite bilara    |
| J12                | 1136 $\pm$ 38 | -2.34                     | granite bilara    |
| J13                | 1104 $\pm$ 37 | 1.25                      | granite bilara    |
| J9                 | 1076 $\pm$ 42 | -2.87                     | granite bilara    |
| J24                | 1065 $\pm$ 28 | -4.21                     | granite bilara    |
| Wang et al., 2018  |               |                           |                   |
| RJW1416-09         | 763 $\pm$ 12  | 0.00                      | rhyolite sindreth |
| RJW1418-01         | 764 $\pm$ 10  | 0.26                      | rhyolite sindreth |
| RJW1418-09         | 773 $\pm$ 9   | 0.39                      | rhyolite sindreth |
| RJW1418-12         | 780 $\pm$ 10  | 0.64                      | rhyolite sindreth |
| RJW1418-13         | 776 $\pm$ 9   | -0.91                     | rhyolite sindreth |

|            |        |                         |
|------------|--------|-------------------------|
| RJW1416-05 | 759±9  | 4.89 rhyolite sindreth  |
| RJW1416-08 | 762±8  | 1.30 rhyolite sindreth  |
| RJW1418-03 | 761±9  | -4.10 rhyolite sindreth |
| RJW1418-06 | 777±8  | 4.43 rhyolite sindreth  |
| RJW1418-10 | 766±14 | 1.92 rhyolite sindreth  |

de Wall et al., 2018

|         |        |                      |
|---------|--------|----------------------|
| MP-4-01 | 749±12 | -2.18 mirpur granite |
| MP-4-07 | 721±10 | 3.09 mirpur granite  |
| MP-4-09 | 759±13 | 1.30 mirpur granite  |

Van lente et al., 2009

|           |       |                        |
|-----------|-------|------------------------|
| BVL-0028  |       |                        |
| z2        | 879   | -0.39 tonalite         |
| z3        | 871.3 | 0.10 tonalite          |
| BVL-0029  |       |                        |
| z1        | 803.4 | -0.39 mafic tonalite   |
| z2        | 801.4 | -0.10 mafic tonalite   |
| z3        | 799.3 | 0.03 mafic tonalite    |
| BVL-0037B |       |                        |
| z1        | 766.9 | 0.14 rhyolite sindreth |
| z2        | 765.6 | 0.29 rhyolite sindreth |
| BVL-0047B |       |                        |
| z1        | 761.9 | 0.50 rhyolite          |
| z2        | 763.9 | 0.18 rhyolite          |
| z3        | 766.5 | 0.12 rhyolite          |
| BVL-0052  |       |                        |
| z1        | 766.3 | -0.47 rhyolite         |
| z2        | 762.9 | 0.26 rhyolite          |
| z3        | 766.4 | 0.33 rhyolite          |
| BVL-0028  |       |                        |
| z1        | 859.3 | 1.07 tonalite          |

de Wall et al., 2022

|          |        |                       |
|----------|--------|-----------------------|
| JW-18    |        |                       |
| 59a-03.2 | 737±20 | 0.81 granite Bhinmal  |
| 59a-05   | 761±20 | 4.28 granite Bhinmal  |
| 59a-06.1 | 761±48 | 1.04 granite Bhinmal  |
| 59a-07.2 | 757±25 | 0.26 granite Bhinmal  |
| 59a-11   | 801±25 | -0.50 granite Bhinmal |
| 59a-13   | 831±28 | 3.93 granite Bhinmal  |
| 59b-01.1 | 810±40 | -0.25 granite Bhinmal |
| 59b-02.2 | 787±25 | 0.63 granite Bhinmal  |
| 59b-06   | 790±25 | 0.00 granite Bhinmal  |
| 59b-08   | 778±25 | -0.91 granite Bhinmal |
| 59b-09.2 | 817±32 | -1.87 granite Bhinmal |
| 59b-10   | 801±28 | -1.65 granite Bhinmal |

|          |        |                       |
|----------|--------|-----------------------|
| 59b-15   | 807±36 | -0.88 granite Bhinmal |
| 59b-16   | 785±29 | 0.13 granite Bhinmal  |
| 59b-17.1 | 798±27 | 0.25 granite Bhinmal  |
| 59b-19.2 | 799±30 | -0.38 granite Bhinmal |

#### **Hanging Wall Unit (South Delhi Fold Belt)**

| References        | age (Ma) | degree of discordance (%) | Rock type     |
|-------------------|----------|---------------------------|---------------|
| Zhao et al., 2018 |          |                           |               |
| RJ01-8            | 992±8    | -0.51                     | moras granite |
| RJ01-5            | 995±10   | -1.95                     | moras granite |
| RJ01-7            | 983±7    | -3.69                     | moras granite |
| RJ01-11           | 1062±9   | -3.01                     | moras granite |
| RJ01-13           | 1002±8   | -4.93                     | moras granite |
| RJ01-14           | 957±7    | 4.87                      | moras granite |

#### **Dharma Rao et al., 2013**

|            |         |       |                |
|------------|---------|-------|----------------|
| SS-9_13.1  | 1008±9  | 0.98  | peshua granite |
| SS-9_16.1  | 1007±11 | 0.69  | peshua granite |
| SS-9_17.1  | 1013±9  | 0.10  | peshua granite |
| SS-9_20.1  | 989±9   | 0.80  | peshua granite |
| SS-9_21.1  | 1013±10 | -0.10 | peshua granite |
| SS-9_27.1  | 1024±9  | 0.68  | peshua granite |
| SS-10_5.1  | 816±8   | -0.99 | sai granite    |
| SS-10_6.1  | 787±7   | -0.77 | sai granite    |
| SS-10_7.1  | 817±7   | 0.49  | sai granite    |
| SS-10_8.1  | 814±7   | -0.99 | sai granite    |
| SS-10_9.1  | 781±11  | -0.90 | sai granite    |
| SS-10_15.1 | 819±7   | -0.86 | sai granite    |
| SS-10_16.1 | 824±8   | 0.72  | sai granite    |
| SS-10_18.1 | 808±7   | 0.25  | sai granite    |
| SS-10_24.1 | 833±7   | 0.36  | sai granite    |
| SS-10_31.1 | 806±7   | 0.49  | sai granite    |
| SS-11_1.1  | 967±8   | 0.00  | Devala granite |
| SS-11_8.1  | 975±10  | -0.41 | Devala granite |
| SS-11_9.1  | 976±10  | -0.10 | Devala granite |
| SS-11_11.1 | 969±8   | -0.73 | Devala granite |
| SS-11_14.1 | 958±8   | 0.00  | Devala granite |
| SS-11_18.1 | 966±8   | -0.52 | Devala granite |
| SS-11_21.1 | 964±8   | 0.00  | Devala granite |
| SS-11_23.1 | 976±8   | 0.10  | Devala granite |
| SS-11_28.1 | 970±10  | -0.73 | Devala granite |
| SS-11_35.1 | 967±8   | 0.41  | Devala granite |
| SS-9_2.1   | 1026±9  | -3.01 | peshua granite |
| SS-9_3.1   | 1025±10 | -1.99 | peshua granite |
| SS-9_4.1   | 1021±9  | 2.48  | peshua granite |
| SS-9_5.1   | 975±9   | 1.81  | peshua granite |

|            |         |                      |
|------------|---------|----------------------|
| SS-9_7.1   | 1018±9  | 1.17 peshua granite  |
| SS-9_9.1   | 972±9   | 2.90 peshua granite  |
| SS-9_11.1  | 1008±9  | -4.24 peshua granite |
| SS-9_14.1  | 1069±13 | -2.69 peshua granite |
| SS-9_18.1  | 804±11  | -1.77 peshua granite |
| SS-9_19.1  | 1032±10 | -4.56 peshua granite |
| SS-9_23.1  | 1010±10 | -3.80 peshua granite |
| SS-9_25.1  | 1003±10 | 4.75 peshua granite  |
| SS-9_26.1  | 1010±10 | -1.92 peshua granite |
| SS-9_29.1  | 1016±10 | -3.25 peshua granite |
| SS-10_1.1  | 808±8   | 3.12 sai granite     |
| SS-10_2.1  | 804±7   | -2.16 sai granite    |
| SS-10_10.1 | 767±7   | 3.03 sai granite     |
| SS-10_11.1 | 807±8   | 1.71 sai granite     |
| SS-10_12.1 | 853±7   | -3.52 sai granite    |
| SS-10_14.1 | 799±7   | -1.27 sai granite    |
| SS-10_19.1 | 811±7   | -3.84 sai granite    |
| SS-10_22.1 | 812±8   | -4.50 sai granite    |
| SS-10_23.1 | 815±8   | -3.56 sai granite    |
| SS-10_25.1 | 810±10  | -4.79 sai granite    |
| SS-10_28.1 | 808±7   | 1.34 sai granite     |
| SS-10_29.1 | 804±7   | -1.77 sai granite    |
| SS-10_30.1 | 794±7   | 1.73 sai granite     |
| SS-10_32.1 | 843±7   | -4.59 sai granite    |
| SS-10_34.1 | 823±7   | -3.52 sai granite    |
| SS-10_37.1 | 831±7   | -2.59 sai granite    |
| SS-10_38.1 | 854±7   | -1.91 sai granite    |
| SS-11_2.1  | 986±8   | -2.92 Devala granite |
| SS-11_3.1  | 963±8   | -1.37 Devala granite |
| SS-11_4.1  | 952±8   | 4.13 Devala granite  |
| SS-11_5.1  | 977±8   | -1.88 Devala granite |
| SS-11_6.1  | 1012±8  | -3.16 Devala granite |
| SS-11_7.1  | 966±10  | 1.93 Devala granite  |
| SS-11_10.1 | 1017±8  | -2.21 Devala granite |
| SS-11_12.1 | 968±8   | -2.98 Devala granite |
| SS-11_15.1 | 969±8   | -2.87 Devala granite |
| SS-11_16.1 | 950±8   | 2.86 Devala granite  |
| SS-11_17.1 | 963±8   | -2.77 Devala granite |
| SS-11_20.1 | 970±8   | 1.22 Devala granite  |
| SS-11_22.1 | 900±8   | 3.23 Devala granite  |
| SS-11_24.1 | 973±8   | -1.46 Devala granite |
| SS-11_25.1 | 978±8   | 1.01 Devala granite  |
| SS-11_26.1 | 955±8   | -1.27 Devala granite |
| SS-11_27.1 | 943±8   | 1.67 Devala granite  |
| SS-11_29.1 | 944±8   | 2.07 Devala granite  |
| SS-11_30.1 | 910±8   | 2.57 Devala granite  |
| SS-11_31.1 | 949±8   | 3.85 Devala granite  |

|            |       |                      |
|------------|-------|----------------------|
| SS-11_32.1 | 934±8 | 3.51 Devala granite  |
| SS-11_37.1 | 994±8 | -2.90 Devala granite |
| SS-11_39.1 | 999±8 | -1.42 Devala granite |

Singh et al., 2021

|          |         |                             |
|----------|---------|-----------------------------|
| TKB2.3   | 983±21  | -0.82 Rupnagar metarhyolite |
| TKB2.7   | 985±24  | 0.30 Rupnagar metarhyolite  |
| TKB2.8   | 971±19  | 0.82 Rupnagar metarhyolite  |
| TKB2.23  | 967±19  | 0.62 Rupnagar metarhyolite  |
| TKB2.25  | 985±19  | -0.72 Rupnagar metarhyolite |
| TKB3.12  | 963±22  | 0.00 pratapgarh pluton      |
| TKB3.14  | 996±19  | -0.81 pratapgarh pluton     |
| TKB4.2   | 800±19  | 0.50 sumel pluton           |
| TKB4.12  | 755±31  | -0.80 sumel pluton          |
| TKB2.4   | 975±20  | 3.27 Rupnagar metarhyolite  |
| TKB2.5   | 956±19  | 3.24 Rupnagar metarhyolite  |
| TKB2.6   | 990±19  | -3.45 Rupnagar metarhyolite |
| TKB2.9R  | 997±19  | -4.84 Rupnagar metarhyolite |
| TKB2.10R | 981±19  | 1.90 Rupnagar metarhyolite  |
| TKB2.14  | 986±19  | 1.50 Rupnagar metarhyolite  |
| TKB2.13C | 970±19  | 2.51 Rupnagar metarhyolite  |
| TKB2.16  | 982±20  | -4.36 Rupnagar metarhyolite |
| TKB2.18  | 982±19  | -2.40 Rupnagar metarhyolite |
| TKB2.19  | 991±20  | 1.20 Rupnagar metarhyolite  |
| TKB2.21  | 986±19  | 2.67 Rupnagar metarhyolite  |
| TKB2.24  | 978±19  | 2.98 Rupnagar metarhyolite  |
| TKB2.26  | 984±19  | -2.71 Rupnagar metarhyolite |
| TKB2.27  | 997±19  | -3.10 Rupnagar metarhyolite |
| TKB2.28  | 976±19  | 4.97 Rupnagar metarhyolite  |
| TKB2.29  | 970±19  | -2.32 Rupnagar metarhyolite |
| TKB2.30  | 987±19  | -1.96 Rupnagar metarhyolite |
| TKB3.2   | 895±35  | 4.28 pratapgarh pluton      |
| TKB3.6   | 971±19  | 3.38 pratapgarh pluton      |
| TKB3.13  | 1009±36 | -1.00 pratapgarh pluton     |
| TKB4.1   | 951±19  | 2.36 sumel pluton           |
| TKB4.4   | 919±17  | 3.67 sumel pluton           |
| TKB4.20  | 774±15  | 1.90 sumel pluton           |
| TKB4.21  | 1050±39 | -3.55 sumel pluton          |

Singh et al., 2010

|           |        |                                  |
|-----------|--------|----------------------------------|
| TB2-5-1   | 989±29 | 0.60 pelitic granulite surpagla  |
| TB2-5-2   | 977±28 | -0.83 pelitic granulite surpagla |
| TB1-1-2   | 768±8  | -1.45 ambaji granite             |
| TB1-1-4.2 | 760±7  | -4.97 ambaji granite             |
| TB2-5-3   | 990±29 | 1.20 pelitic granulite surpagla  |
| TB2-5-4   | 980±28 | -4.26 pelitic granulite surpagla |
| TB2-5-5   | 981±28 | -1.45 pelitic granulite surpagla |

|         |        |                                 |
|---------|--------|---------------------------------|
| TB2-5-6 | 939±28 | 3.20 pelitic granulite surpagla |
|---------|--------|---------------------------------|

Deb et al., 2001

|           |                            |
|-----------|----------------------------|
| 7 826±4.6 | 0.00 kurd deposit rhyolite |
| 8 982±3.6 | 0.30 kurd deposit rhyolite |
| 1 967±7.9 | 1.80 rhyolite ambaji       |
| 4 822±3.4 | 1.32 granite gneiss ambaji |
| 5 802±4.8 | 3.72 granite gneiss ambaji |
| 9 965±3.5 | 2.38 kurd deposit rhyolite |
